# Supplementary material
Source: PubMed Central journal article supplement (PMC4836395)
Supplement: NIHMS777846-supplement-Supp.pdf [file NIHMS777846-supplement-Supp.pdf]

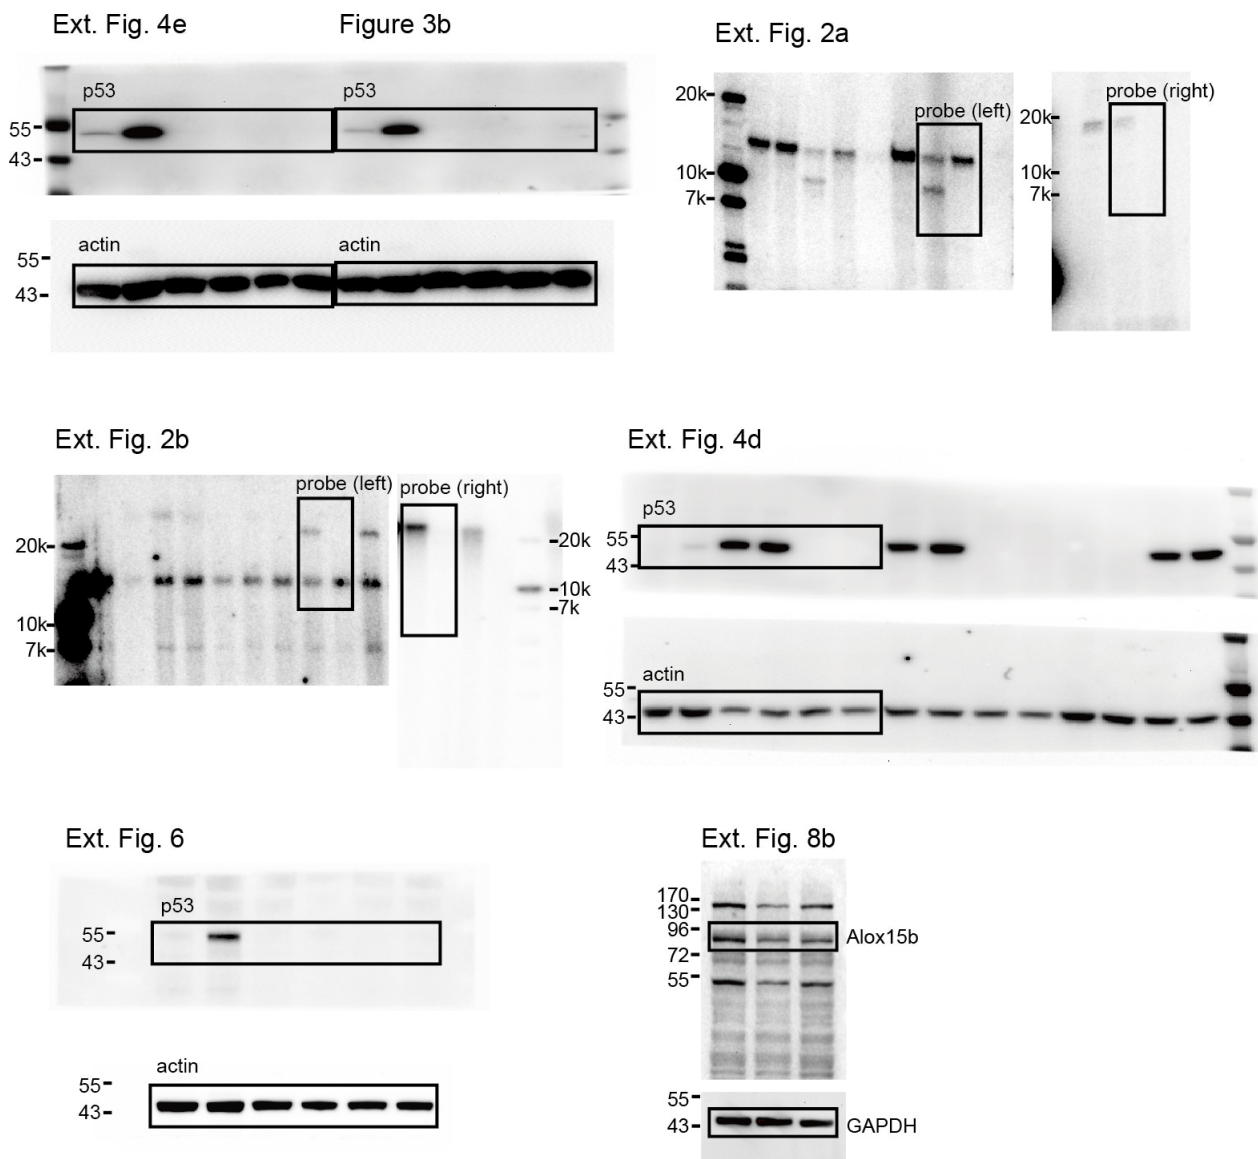

**Supplementary Table 1: Enriched shRNAs and their fold change from in vivo shRNA library screening.**

| shRNA        | Tumor/vector |
|--------------|--------------|
| Alox12b.587  | 500          |
| Alox12b.728  | 25           |
| Alox15b.1252 | 245          |
| Alox15b.2865 | 50           |
| Aloxe3.550   | 2            |
| Chd3.2619    | 16           |
| Chd3.400     | 5            |
| Chrb1.1097   | 67           |
| Chrb1.1830   | 10           |
| Ctdnep1.426  | 27           |
| Ctdnep1.599  | 6            |
| Ctdnep1.602  | 20           |
| Fgf11.417    | 300          |
| Fgf11.418    | 36           |
| Fgf11.553    | 69           |
| Lsmd1.421    | 8            |
| Lsmd1.428    | 17           |
| Mgl2.435     | 51           |
| Mgl2.84      | 16           |
| Myh1.2253    | 27           |
| Myh1.3191    | 10           |
| Myh1.4537    | 20           |
| Myh3.5619    | 5            |
| Myh3.910     | 25           |
| Myh8.48      | 21           |
| Myh8.5400    | 14           |
| Ndel1.1600   | 140          |
| Ndel1.1637   | 40           |
| Ndel1.2287   | 2            |
| Ndel1.324    | 2            |
| Ndel1.332    | 21           |
| Ntn1.1687    | 115          |
| Ntn1.3919    | 52           |
| Phf23.338    | 80           |
| Phf23.877    | 57           |
| Phf23.971    | 46           |
| Rcvrn.1033   | 76           |
| Rcvrn.17     | 63           |
| Usp43.4137   | 20           |
| Usp43.4248   | 3            |

**Supplementary Table 2: Primer sequences**

Genotyping primers and PCR primers for Southern probes:

|               |                          |
|---------------|--------------------------|
| 11B3-F(puroF) | TGCATCCATCTAGATCCACTG    |
| 11B3-R(puroR) | CCTTCCATCTGTTGCTGCG      |
| Neo-F         | TTGAACAAGATGGATTGCACG    |
| Neo-R         | AAGAAGGCGATAGAAGGCGA     |
| 91j22-F       | TGCTCTATTTGCTCAGTGTGCTT  |
| 91j22-R       | AAGGCTGGATCCTGAGTGAAA    |
| 248j19-F      | TGTCTCATGCACTGAGGTTTTTG  |
| 248j19-R      | ACTCTGAGAGCACCTGCATGTT   |
| df-F          | CCTCATGGACTAATTATGGAC    |
| df-R          | CCAGTTTCACTAATGACACA     |
| dp-F          | AACTGGCTGAGTGACGCCCTTTAT |
| dp-R          | TGAGACGTGCTACTTCCATTTGTC |

Q- PCR primers:

|               |                        |
|---------------|------------------------|
| Sco1-F        | AGCATTGGGAAGCCTTTACT   |
| Sco1-R        | CAATACCCATTGACCCAGGTAG |
| Trp53 exon3-F | TCCAGACTTCCTCCAGAAGATA |
| Trp53 exon3-R | CTGTGGATGGGACAAAGAAGA  |
| Trp53 exon5-F | ACAGCGTGGTGGTACCTTAT   |
| Trp53 exon5-R | GGGTTGCTAGAAAGTCAACATC |

Trp53 exon9-F TTGTCCAGTGCTTCCATCTC  
Trp53 exon9-R TCCTTTAACTCTAAGGCCTCATTC  
Eif5a-F ACACTCTTCTAAGCCACCAATC  
Eif5a-R GATATCTGCCCGTCAACTCATAA  
Alox12-F CTTTGATACTCTACTTCAGGGAGTT  
Alox12-R CAGATTTGGTGTGGCCATTG  
Nf1-F GCTTCACTCATTGCCCTGATA  
Nf1-R GCAGATCATGAGTGGTCTCTTAC  
Rpa3-F TGAACAGTACGGTGCTTTACTC  
Rpa3-R CCGTGCTCTGTGCATCTTAT  
11B3-Q-F AGCTGCAAGAACTCTTCCTCACG  
11B3-Q-R AGGAGGCCTTCCATCTGTTGCT  
Actin-F TGGTGATAAGTGGCCTTGGAGTGT  
Actin-R ATGCAAGGAGTGCAAGAACACAGC  
p21-Q-F ATCACCAGGATTGGACATGG  
p21-Q-R CGGTGTCAGAGTCTAGGGGA  
HPRT-F GCGTCGTGATTAGCGATGATGAAC  
HPRT-R GAGCAAGTCTTTCAGTCCTGTCCA

PCR primers for Trp53 sequencing:

p53-exon2-4-F TGGATGTCCACCTTCTTTT  
p53-exon2-4-R AGCCAAGAAAGGAATGTGAGG

|               |                          |
|---------------|--------------------------|
| p53-exon5-6-F | AAAGGTCCCAGTCCTCTCTTT    |
| p53-exon5-6-R | TGTTAAAGTAGACCCTGGGCT    |
| p53-exon7-9-F | TGTGCCGAACAGGTGGAATAT    |
| p53-exon7-9-R | ACGGCTAGAGATAAAGCCACTGA  |
| p53-exon10-F  | CCCCCAAAAAAAAAAAAAACAA   |
| p53-exon10-R  | TCAAGAAGTCAGTTCTCGTAGGGT |
| p53-exon11-F  | ATCCCTACCCATAGTAGAAGCCAT |
| p53-exon11-R  | TTCTGGAACCCAAGTTCCC      |

**Supplementary Table 3: shRNA sequences**

|              |                         |
|--------------|-------------------------|
| Alox15b.1252 | TTGATGTGCAGTGTGTACCGAA  |
| Alox15b.2865 | TATGTGCATACACTGTCGCTGT  |
| Eif5a.691    | TAGGCTCATGGATCACTGCTGC  |
| Eif5a.754    | TTGAATAGGAGTCCAGCCAAG   |
| p53.1148     | AACTCTAAGGCCTCATT CAGCT |
| p53.1224     | TTACACATGTACTTGTAGTGGA  |
| Ren.713      | TAGATAAGCATTATAATTCCTA  |
